# Supplementary material
Source: ML conference proceedings conference paper supplement (https://openreview.net/forum?id=204YOrDHny)

Sampled Full Distribution

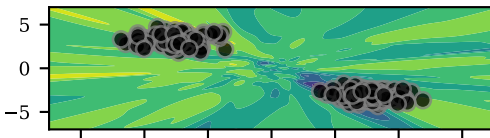

Sampled Kernel Distribution

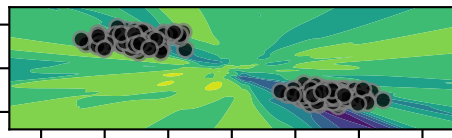

Sampled Non-Kernel Distribution

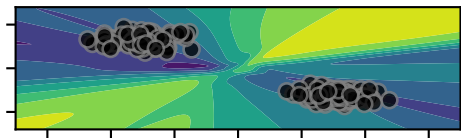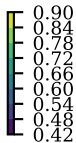

Linearized Laplace uncertainty

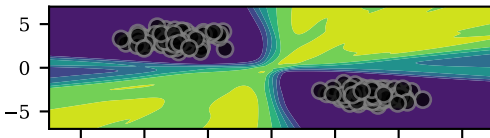

Linearized Kernel uncertainty

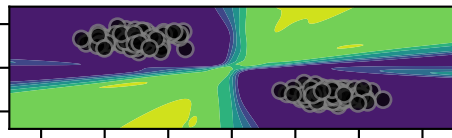

Linearized Non-Kernel uncertainty

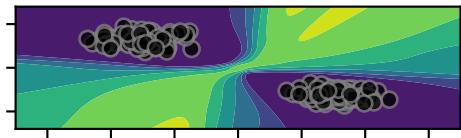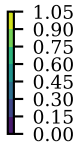

Laplace Diffusion uncertainty

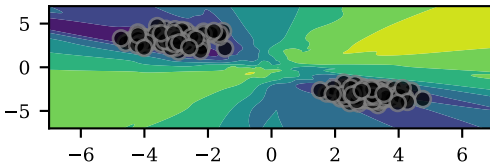

Diffusion Kernel uncertainty

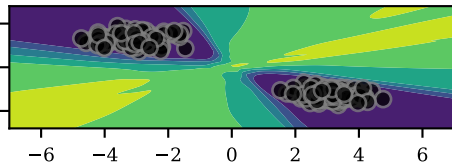

Diffusion Non-Kernel uncertainty

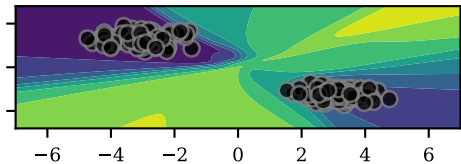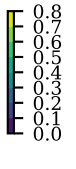

Supplement: supplementary_material [file attachment]
