# Supplementary material
Source: ML conference proceedings conference paper supplement (https://openreview.net/forum?id=204YOrDHny)

Sampled Laplace Uncertainty

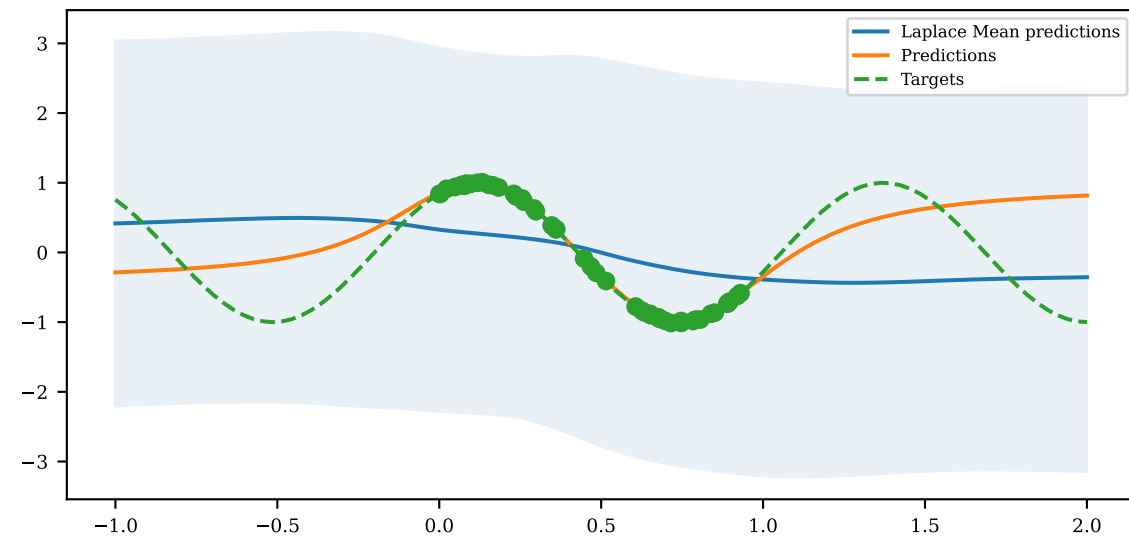

Linearised Laplace Uncertainty

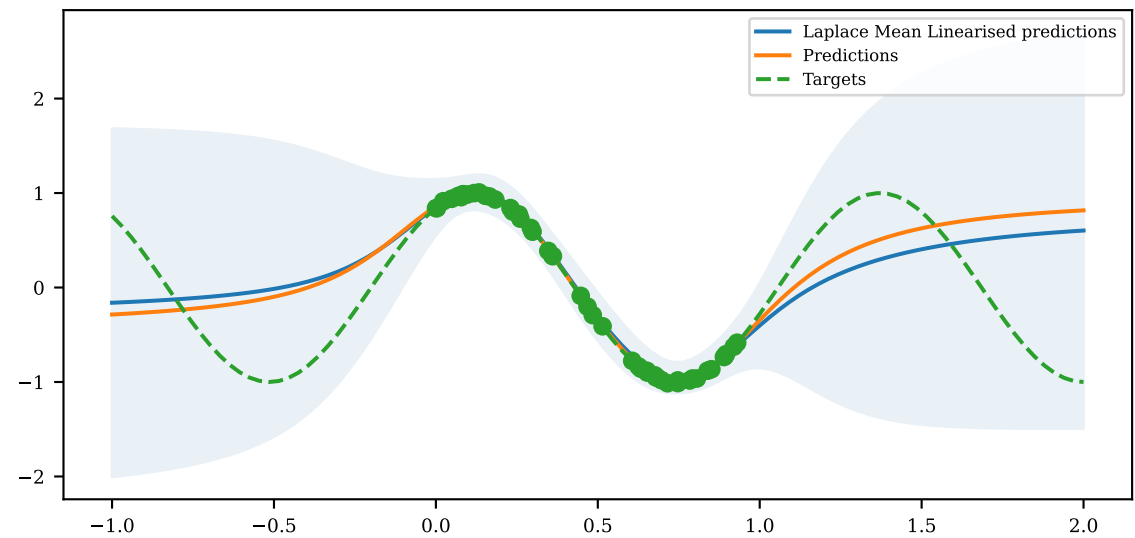

Diagonal Laplace Uncertainty

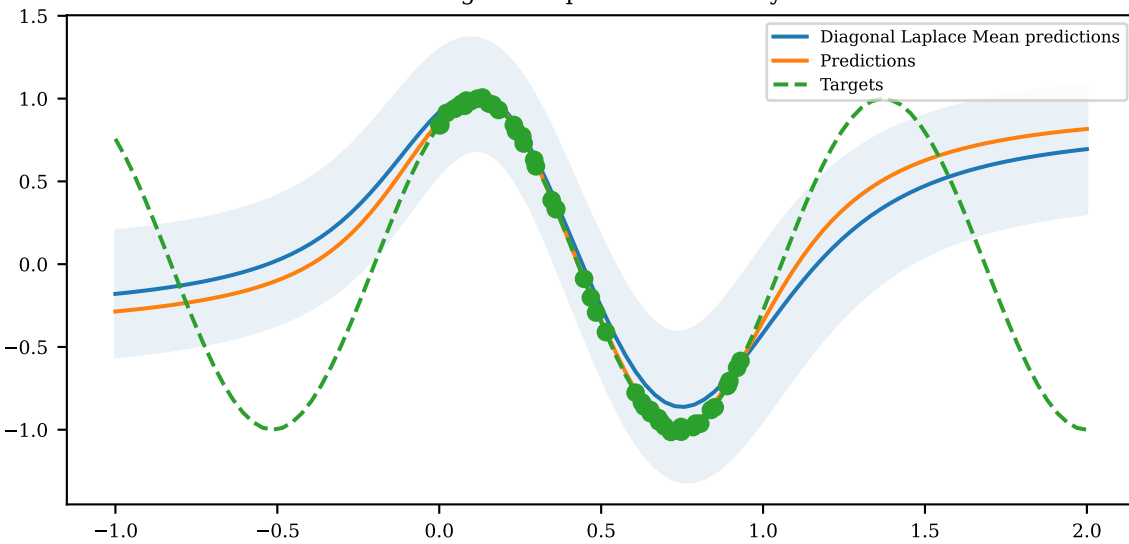

Linearised Diagonal Laplace Uncertainty

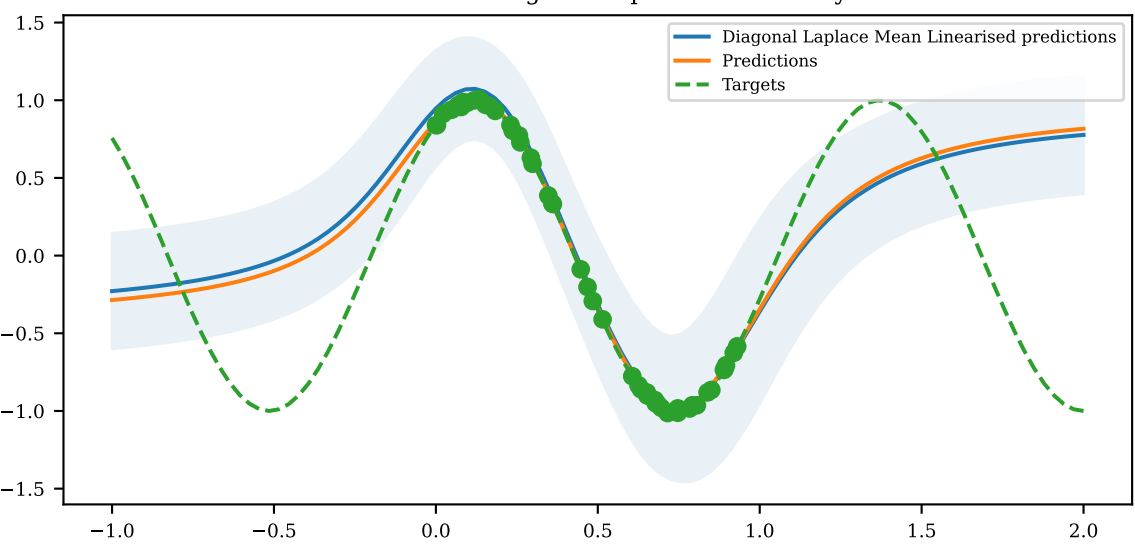

Supplement: supplementary_material [file attachment]
